# Supplementary material
Source: PubMed Central journal article supplement (PMC1415282)
Supplement: mbc_E05-11-1090_1.pdf [file mbc_E05-11-1090_1.pdf]

### Excluded: near identical sequences (gene duplications)

| Name         | GenomeDB ID  | NCBI ID     | Closest included | Group      | Subgroup | Annotation                                                                                                              |
|--------------|--------------|-------------|------------------|------------|----------|-------------------------------------------------------------------------------------------------------------------------|
| At_5g10470   | AT5G10470.1  | AJ001729    | At_5g65460       | Kinesin-14 |          | KINESIN MOTOR PROTEIN-RELATED TH65 PROTEIN                                                                              |
| At_KatB      | AT4G27180.1  |             | At_KatC          | Kinesin-14 | 14A      | KINESIN-LIKE PROTEIN B (KATB)                                                                                           |
| At_KLPA      | AT4G05190.1  |             | At_KatA          | Kinesin-14 | 14A      | KINESIN-LIKE PROTEIN A, PUTATIVE KINESIN LIKE PROTEIN A                                                                 |
| Ce_KLP16     |              | NP_492527   | Ce_KLP15         | Kinesin-14 | 14A      |                                                                                                                         |
| Ce_KLP18     |              | NP_501093   | Ce_KLP10         | U/G        |          |                                                                                                                         |
| Eh_KLP4      | 172.m0081    |             | Eh_KLP1          | Kinesin-14 | 14A      | Entamoeba histolytica chr unknown   Auto                                                                                |
| Hs_Kif1B     |              | O60333      | Hs_Kif1A         | Kinesin-3  |          | KF1B_HUMAN Kinesin-like protein KIF1B (Klp)                                                                             |
| Hs_nKHCa     |              | Q12840      | Hs_uKHC          | Kinesin-1  |          | KINN_HUMAN Neuronal kinesin heavy chain (NKHC) (Kinesin heavy chain isoform 5A) (Kinesin heavy chain neuron-specific 1) |
| Hs_nKHCc     |              | NP_004513.1 | Hs_uKHC          | Kinesin-1  |          | kinesin family member 5C; Kinesin, heavy chain, neuron-specific [Homo sapiens]                                          |
| Lm14.1110    | LmjF14.1110  |             | Lm14.1100        | Tryp2      |          | kinesin K39, putative [Leishmania major]                                                                                |
| Lm14.1120    | LmjF14.1120  |             | Lm14.1100        | Tryp2      |          | kinesin K39, putative [Leishmania major]                                                                                |
| Lm16.1460    | LmjF16.1460  |             | Lm16.1470        | U/G        |          | kinesin, putative [Leishmania major]                                                                                    |
| Lm19.0690    | LmjF19.0690  |             | Lm19.0680        | Tryp2      |          | kinesin, putative [Leishmania major]                                                                                    |
| Lm29.2390    | LmjF29.2390  |             | Lm29.2380        | Tryp2      |          | kinesin, putative [Leishmania major]                                                                                    |
| Tb927.2.5600 | Tb927.2.5600 |             | Tb927.2.5540     | -          |          | hypothetical protein, conserved [Trypanosoma brucei]                                                                    |
| Tb927.2.5610 | Tb927.2.5610 |             | Tb927.2.5530     | -          |          | hypothetical protein, conserved [Trypanosoma brucei]                                                                    |
| Tb927.2.5650 | Tb927.2.5650 |             | Tb927.2.5480     | -          |          | hypothetical protein, conserved [Trypanosoma brucei]                                                                    |
| Tb927.3.3400 | Tb927.3.3400 |             | Tb927.3.3390     | Tryp2      |          | kinesin, putative [Trypanosoma brucei]                                                                                  |

### Excluded: fragmentary sequences

| Name        | GenomeDB ID | NCBI ID    | Annotation                      |
|-------------|-------------|------------|---------------------------------|
| Cr_1020013  | C_1020013   |            | Kinesin, motor region           |
| Cr_200191   | C_200191    |            | Kinesin, motor region           |
| Cr_23480001 | C_23480001  |            | Kinesin, motor region           |
| Cr_3980001  | C_3980001   |            | Kinesin, motor region           |
| Cr_60056    | C_60056     |            | Kinesin, motor region           |
| Cr_60057    | C_60057     |            | Kinesin, motor region           |
| Cr_7460001  | C_7460001   |            | Kinesin, motor region           |
| Cr_990021   | C_990021    |            | Kinesin, motor region           |
| Hs_Kif26A   |             | BAA86550.2 | KIAA1236 protein [Homo sapiens] |

### Excluded: divergent sequences (failed imposed HMM cut-off)

| Name           | GenomeDB ID         | NCBI ID     | Annotation                                                                                                                             |
|----------------|---------------------|-------------|----------------------------------------------------------------------------------------------------------------------------------------|
| At_1g20060     | AT1G20060.1         | NP_173434.1 | KINESIN MOTOR PROTEIN-RELATED                                                                                                          |
| At_5g23910     | AT5G23910.1         | BAB10064.1  | KINESIN MOTOR PROTEIN-RELATED                                                                                                          |
| Ce_VAB8        |                     | NP_506063.2 | variable ABnormal morphology VAB-8, UNCoordinated locomotion UNC-107, kinesin-like protein (118.2 kD) (vab-8) [Caenorhabditis elegans] |
| Cp_KLP1        |                     | EAK90249.1  | domain similar to KOG0246, kinesin-like protein [Cryptosporidium parvum]                                                               |
| Cp_KRP1        |                     | EAK88368.1  | TRAFAC type P-loop GTPase that may be related to kinesin [Cryptosporidium parvum]                                                      |
| Cp_KRP2        |                     | CAD98712.1  | kinesin-related protein, possible [Cryptosporidium parvum]                                                                             |
| Cp_unk1        |                     | CAD98708.1  | hypothetical predicted protein, unknown function [Cryptosporidium parvum]                                                              |
| Cr_1020008     | C_1020008           |             |                                                                                                                                        |
| Cr_180062      | C_180062            |             |                                                                                                                                        |
| Cr_230013      | C_230013            |             |                                                                                                                                        |
| Cr_450116      | C_450116            |             |                                                                                                                                        |
| Cr_460075      | C_460075            |             |                                                                                                                                        |
| Cr_4640001     | C_4640001           |             |                                                                                                                                        |
| Cr_770005      | C_770005            |             |                                                                                                                                        |
| Dm_Cos         | CG1708-PA           | NP_477092.1 | CG1708-PA [Drosophila melanogaster]                                                                                                    |
| Eh_KLP2        |                     | XP_649327.1 | Entamoeba histolytica chr unknown   Auto                                                                                               |
| GI_kap3_like   | GLP_396_3141_5447   | EAA37479.1  | GLP_396_3141_5447 [Giardia lamblia ATCC 50803]                                                                                         |
| GI_Kif21a_like | GLP_25_59975_58209  | EAA40988.1  | GLP_25_59975_58209 [Giardia lamblia ATCC 50803]                                                                                        |
| GI_KLP6_1      | GLP_9_38744_36417   | EAA38295.1  | GLP_9_38744_36417 [Giardia lamblia ATCC 50803]                                                                                         |
| GI_KRP_like2   | GLP_436_12181_14100 | EAA38721.1  | GLP_436_12181_14100 [Giardia lamblia ATCC 50803]                                                                                       |

|               |                    |             |                                                                |
|---------------|--------------------|-------------|----------------------------------------------------------------|
| GI_unlikely1  | GLP_23_63555_65009 | EAA40642.1  | GLP_23_63555_65009 [Giardia lamblia ATCC 50803]                |
| GI_unlikely2  | GLP_22_6380_7342   | EAA38721.1  | GLP_22_6380_7342 [Giardia lamblia ATCC 50803]                  |
| Lm01.0010     | LmjF01.0010        | AAC24615.1  | MCAK-like kinesin, putative [Leishmania major]                 |
| Lm06.0430     | LmjF06.0430        | CAJ02088.1  | hypothetical protein, conserved [Leishmania major]             |
| Lm09.0290     | LmjF09.0290        | CAJ02421.1  | kinesin, putative [Leishmania major]                           |
| Lm13.0700     | LmjF13.0700        | CAJ02677.1  | kinesin, putative [Leishmania major]                           |
| Lm17.0160     | LmjF17.0160        | CAJ03457.1  | hypothetical protein, conserved [Leishmania major]             |
| Lm18.1530     | LmjF18.1530        | CAJ04295.1  | kinesin, putative [Leishmania major]                           |
| Lm20.0750     | LmjF20.0750        |             |                                                                |
| Lm32.0420     | LmjF32.0420        | CAJ08514.1  | hypothetical protein, conserved [Leishmania major]             |
| Lm35.2000     | LmjF35.2000        |             |                                                                |
| Lm35.4700     | LmjF35.4700        |             |                                                                |
| Lm36.5150     | LmjF36.5150        | CAJ09487.1  | hypothetical protein, conserved [Leishmania major]             |
| Pf_KLP6       | MAL8P1.132         | NP_704486.1 | hypothetical protein Plasmodium falciparum chr 8 SANGER Manual |
| Tb09.211.1400 | Tb09.211.1400      |             |                                                                |
| Tb10.389.1210 | Tb10.389.1210      |             |                                                                |
| Tb10.389.1270 | Tb10.389.1270      |             |                                                                |
| Tb10.61.2100  | Tb10.61.2100       |             |                                                                |
| Tb927.2.5480  | Tb927.2.5480       | AAX78987.1  | hypothetical protein, conserved [Trypanosoma brucei]           |
| Tb927.2.5530  | Tb927.2.5530       | AAX78992.1  | hypothetical protein, conserved [Trypanosoma brucei]           |
| Tb927.2.5540  | Tb927.2.5540       | AAX78990.1  | hypothetical protein, conserved [Trypanosoma brucei]           |
| Tb927.3.2490  | Tb927.3.2490       | AAX80727.1  | hypothetical protein, conserved [Trypanosoma brucei]           |
| Tb927.5.2360  | Tb927.5.2360       | AAX80440.1  | hypothetical protein, conserved [Trypanosoma brucei]           |
| Tb927.6.2520  | Tb927.6.2520       | AAX80884.1  | hypothetical protein, conserved [Trypanosoma brucei]           |
| Tb927.6.2880  | Tb927.6.2880       | AAX80991.1  | kinesin, putative [Trypanosoma brucei]                         |
| Tb927.7.4110  | Tb927.7.4110       | AAZ12475.1  | kinesin, putative [Trypanosoma brucei]                         |
| Tb927.7.5040  | Tb927.7.5040       | AAX79496.1  | hypothetical protein, conserved [Trypanosoma brucei]           |
| Tb927.8.6830  | Tb927.8.6830       | AAX80044.1  | kinesin, putative [Trypanosoma brucei]                         |
| Tp_107522     | Tp_107522          |             |                                                                |
| Tp_123312     | Tp_123312          |             |                                                                |
| Tp_128511     | Tp_128511          |             |                                                                |
| Tp_149297     | Tp_149297          |             |                                                                |
| Tt_15553      | Tt_15553           |             |                                                                |
| Tt_1812       | Tt_1812            |             |                                                                |
| Tt_21462      | Tt_21462           |             |                                                                |
| Tt_21463      | Tt_21463           |             |                                                                |
| Tt_22322      | Tt_22322           |             |                                                                |
| Tt_25564      | Tt_25564           |             |                                                                |
| Tt_9090       | Tt_9090            |             |                                                                |

## Included sequences

| Name       | Alt. name | GenomeDB ID | NCBI ID     | Group      | Subgroup | Annotation                                                                                                                                                                           |
|------------|-----------|-------------|-------------|------------|----------|--------------------------------------------------------------------------------------------------------------------------------------------------------------------------------------|
| At_1g01950 |           | AT1G01950.1 | NP_171697.3 | U/G        |          | ARMADILLO/BETA-CATENIN REPEAT FAMILY PROTEIN / KINESIN MOTOR FAMILY PROTEIN SIMILAR TO KINESIN-LIKE PROTEIN GB:CAB41097 GI:5541717 FROM [ARABIDOPSIS THALIANA]                       |
| At_1g09170 |           | AT1G09170.1 | NP_172389.2 | Kinesin-14 | 14B      | KINESIN MOTOR PROTEIN-RELATED SIMILAR TO GB:AAB61066                                                                                                                                 |
| At_1g12430 |           | AT1G12430.1 | NP_563908.1 | U/G        |          | ARMADILLO/BETA-CATENIN REPEAT FAMILY PROTEIN / KINESIN MOTOR FAMILY PROTEIN                                                                                                          |
| At_1g18410 |           | AT1G18410.1 | NP_173277.2 | Kinesin-14 | 14B      | KINESIN MOTOR PROTEIN-RELATED SIMILAR TO KINESIN-RELATED PROTEIN GB:AAF24855 GI:6692749 FROM [ARABIDOPSIS THALIANA]                                                                  |
| At_1g18550 |           | AT1G18550.1 | NP_173290.1 | Kinesin-8  |          | KINESIN MOTOR PROTEIN-RELATED CONTAINS SIMILARITY TO KINESIN-RELATED PROTEIN GI:4493964 FROM [PLASMODIUM FALCIPARUM]                                                                 |
| At_1g55550 |           | AT1G55550.1 | AAD10640.1  | Kinesin-14 |          | KINESIN MOTOR PROTEIN-RELATED SIMILAR TO KINESIN PROTEINS; CONTAINS KINESIN MOTOR DOMAIN PROTEIN MOTIF AND KINESIN HEAVY CHAIN SIGNATURE MOTIF                                       |
| At_1g59540 | kin2      | AT1G59540.1 | BAA88114.1  | Kinesin-7  |          | KINESIN MOTOR PROTEIN-RELATED SIMILAR TO KINESIN MOTOR PROTEIN (KIN2) GI:2062751 FROM (USTILAGO MAYDIS)                                                                              |
| At_1g63640 |           | AT1G63640.1 | NP_176551.2 | Kinesin-14 | 14B      | KINESIN MOTOR PROTEIN-RELATED C-TERMINAL REGION IS SIMILAR TO C-TERM REGION OF KINESIN MOTOR PROTEIN GB:AAB51397 (MUS MUSCULUS); CONTAINS PFAM PROFILE: PF00225 KINESIN MOTOR DOMAIN |
| At_1g72250 |           | AT1G72250.1 | NP_177370.1 | Kinesin-14 | 14B      | KINESIN MOTOR PROTEIN-RELATED                                                                                                                                                        |
| At_1g73860 |           | AT1G73860.1 | NP_177527.2 | Kinesin-14 | 14B      | KINESIN MOTOR PROTEIN-RELATED SIMILAR TO KINESIN-C GB:AAF04841 FROM [STRONGYLOCENTROTUS PURPURATUS]                                                                                  |

|            |         |             |             |              |           |                                                                                                                                                                                    |
|------------|---------|-------------|-------------|--------------|-----------|------------------------------------------------------------------------------------------------------------------------------------------------------------------------------------|
| At_2g21300 |         | AT2G21300.1 | NP_179726.2 | Kinesin-7    |           | KINESIN MOTOR FAMILY PROTEIN CONTAINS PFAM PROFILE: KINESIN MOTOR DOMAIN PF00225                                                                                                   |
| At_2g21380 |         | AT2G21380.1 | AA12893.1   | Kinesin-7    |           | KINESIN MOTOR PROTEIN-RELATED                                                                                                                                                      |
| At_2g22610 |         | AT2G22610.1 | NP_179846.2 | Kinesin-14   | 14B       | KINESIN MOTOR PROTEIN-RELATED                                                                                                                                                      |
| At_2g28620 |         | AT2G28620.1 | AAD24373.1  | Kinesin-5    |           | KINESIN MOTOR PROTEIN-RELATED                                                                                                                                                      |
| At_2g37420 |         | AT2G37420.1 | NP_850281.1 | Kinesin-5    |           | KINESIN MOTOR PROTEIN-RELATED                                                                                                                                                      |
| At_2g47500 |         | AT2G47500.1 | NP_850475.1 | Kinesin-14   | 14B       | KINESIN MOTOR PROTEIN-RELATED                                                                                                                                                      |
| At_3g10180 |         | AT3G10180.1 | NP_187629.2 | Kinesin-7    |           | KINESIN MOTOR PROTEIN-RELATED SIMILAR TO CENTROMERE PROTEIN E GB:4502781 [HOMO SAPIENS]                                                                                            |
| At_3g10310 |         | AT3G10310.1 | AAF02812.1  | Kinesin-14   | 14B       | KINESIN MOTOR PROTEIN-RELATED SIMILAR TO CARBOXY-TERMINAL KINESIN 2 GB:P79955 [XENOPUS LAEVIS]                                                                                     |
| At_3g12020 |         | AT3G12020.1 | NP_187809.2 | Kinesin-7    |           | KINESIN MOTOR PROTEIN-RELATED SIMILAR TO PUTATIVE KINESIN HEAVY CHAIN GB:AAD23684 GI:4567271 FROM [ARABIDOPSIS THALIANA]                                                           |
| At_3g16060 | MSL1_10 | AT3G16060.1 | AAL31147.1  | Kinesin-13   |           | KINESIN MOTOR FAMILY PROTEIN SIMILAR TO KINESIN HEAVY CHAIN MEMBER 2 GB:NP_032468 FROM [MUS MUSCULUS]; CONTAINS PFAM PROFILE PF00225: KINESIN MOTOR DOMAIN                         |
| At_3g16630 |         | AT3G16630.1 | AAL07208.1  | Kinesin-13   |           | KINESIN MOTOR FAMILY PROTEIN SIMILAR TO MITOTIC CENTROMERE-ASSOCIATED KINESIN GB:AAC27660 FROM [HOMO SAPIENS]; CONTAINS PFAM PROFILE PF00225: KINESIN MOTOR DOMAIN                 |
| At_3g17360 |         | AT3G17360.1 | NP_188362.1 | Kinesin-15   |           | KINESIN MOTOR PROTEIN-RELATED SIMILAR TO KLP2 PROTEIN GB:CAA63826 FROM [XENOPUS LAEVIS]                                                                                            |
| At_3g19050 |         | AT3G19050.1 | NP_188535.3 | Kinesin-15   |           | KINESIN MOTOR PROTEIN-RELATED CONTAINS PFAM PROFILE: PF00225 KINESIN MOTOR DOMAIN; CONTAINS NON-CONSENSUS SPLICE SITE (GC) AT INTRON 12                                            |
| At_3g20150 |         | AT3G20150.1 | NP_188650.2 | Kinesin-15   |           | KINESIN MOTOR FAMILY PROTEIN CONTAINS PFAM DOMAIN, PF00225: KINESIN MOTOR DOMAIN                                                                                                   |
| At_3g23670 |         | AT3G23670.1 | AA16471.1   | Kinesin-15   |           | PHRAGMOPLAST-ASSOCIATED KINESIN-RELATED PROTEIN, PUTATIVE SIMILAR TO KINESIN LIKE PROTEIN GB:CAB10194 FROM [ARABIDOPSIS THALIANA]                                                  |
| At_3g44730 |         | AT3G44730.1 | NP_190059.3 | Kinesin-14   | 14B       | KINESIN MOTOR PROTEIN-RELATED SIMILAR TO 4 OTHER KINESIN-LIKE PROTEINS OF A. THALIANA: F02P16.12 (PID:G2191180), KATA (D11371), KATB (D21137), AND KATC (D21138)                   |
| At_3g45850 |         | AT3G45850.1 | CAB82809.1  | Kinesin-5    |           | KINESIN MOTOR PROTEIN-RELATED KINESIN-RELATED PROTEIN TKRP125, NICOTIANA TABACUM, PIR:T02017                                                                                       |
| At_3g49650 |         | AT3G49650.1 | CAB62469.1  | Kinesin-8    |           | KINESIN MOTOR PROTEIN-RELATED SEVERAL KINESIN-LIKE PROTEINS                                                                                                                        |
| At_3g50240 |         | AT3G50240.1 | NP_566931.1 | Kinesin-4/10 | Kinesin-4 | KINESIN MOTOR PROTEIN-RELATED KINESIN-LIKE PROTEIN KIF4, HOMO SAPIENS, EMBL:AF179308                                                                                               |
| At_3g51150 |         | AT3G51150.1 | NP_190684.2 | Kinesin-7    |           | KINESIN MOTOR FAMILY PROTEIN CONTAINS PFAM DOMAIN, PF00225: KINESIN MOTOR DOMAIN                                                                                                   |
| At_3g54870 |         | AT3G54870.1 | NP_191047.3 | U/G          |           | ARMADILLO/BETA-CATENIN REPEAT FAMILY PROTEIN / KINESIN MOTOR FAMILY PROTEIN KINESIN, SYNCEPHALASTRUM RACEMOSUM, AJ225894                                                           |
| At_4g24170 |         | AT4G24170.1 | NP_567695.1 | Kinesin-7    |           | KINESIN MOTOR FAMILY PROTEIN CONTAINS PFAM DOMAIN, PF00225: KINESIN MOTOR DOMAIN                                                                                                   |
| At_4g38950 |         | AT4G38950.1 | NP_195606.1 | Kinesin-7    |           | KINESIN MOTOR FAMILY PROTEIN SIMILAR TO ATNACK1 KINESIN-LIKE PROTEIN (GI:19979627) [ARABIDOPSIS THALIANA]; SIMILAR TO KINESIN-LIKE PROTEIN NACK1 (GI:19570247) [NICOTIANA TABACUM] |
| At_5g02370 |         | AT5G02370.1 | NP_195857.2 | U/G          |           | KINESIN MOTOR PROTEIN-RELATED KINESIN, XENOPUS LAEVIS, EMBL:XLA249840                                                                                                              |
| At_5g06670 |         | AT5G06670.1 | NP_196285.2 | Kinesin-7    |           | KINESIN MOTOR PROTEIN-RELATED                                                                                                                                                      |
| At_5g27000 |         | AT5G27000.1 | NP_568491.1 | Kinesin-14   | 14B       | KINESIN MOTOR PROTEIN-RELATED NON-CONSENSUS AT DONOR SPLICE SITE AT EXON 12; NON-CONSENSUS AC ACCEPTOR SPLICE SITE AT EXON 13                                                      |
| At_5g27550 |         | AT5G27550.1 | NP_198107.1 | Kinesin-14   | 14B       | KINESIN MOTOR PROTEIN-RELATED KINESIN-LIKE HEAVY CHAIN - ARABIDOPSIS THALIANA, EMBL:AF080249                                                                                       |
| At_5g27950 | F15F15  | AT5G27950.1 | AAO11533.1  | Kinesin-14   |           | KINESIN MOTOR PROTEIN-RELATED KINESIN HEAVY CHAIN-LIKE PROTEIN, POTATO, PIR:T07397                                                                                                 |
| At_5g41310 |         | AT5G41310.1 | NP_198947.1 | Kinesin-14   | 14B       | KINESIN MOTOR PROTEIN-RELATED                                                                                                                                                      |
| At_5g42490 |         | AT5G42490.1 | BAB10490.1  | Kinesin-7    |           | KINESIN MOTOR FAMILY PROTEIN CONTAINS PFAM DOMAIN, PF00225: KINESIN MOTOR DOMAIN                                                                                                   |
| At_5g60930 |         | AT5G60930.1 | NP_200901.2 | Kinesin-4/10 | Kinesin-4 | CHROMOSOME-ASSOCIATED KINESIN, PUTATIVE MICROTUBULE-ASSOCIATED MOTOR KIF4 , MUS MUSCULUS, PIR:A54803                                                                               |
| At_5g65460 |         | AT5G65460.1 | NP_201349.2 | Kinesin-14   |           | KINESIN MOTOR PROTEIN-RELATED CONTAINS SIMILARITY TO KINESIN HEAVY CHAIN                                                                                                           |
| At_5g66310 |         | AT5G66310.1 | NP_201432.2 | Kinesin-7    |           | KINESIN MOTOR FAMILY PROTEIN CONTAINS PFAM DOMAIN, PF00225: KINESIN MOTOR DOMAIN                                                                                                   |
| At_FRA1    |         | AT5G47820.1 | AA186115.1  | Kinesin-4/10 | Kinesin-4 | KINESIN-LIKE PROTEIN (FRA1) IDENTICAL TO KINESIN-LIKE PROTEIN [ARABIDOPSIS THALIANA] GI:27260890; CONTAINS PFAM PROFILE PF00225: KINESIN MOTOR DOMAIN                              |
| At_K125    |         | AT2G36200.1 | AAD21445.1  | Kinesin-5    |           | KINESIN MOTOR PROTEIN-RELATED                                                                                                                                                      |
| At_KatA    |         | AT4G21270.1 | CAB79127.1  | Kinesin-14   | 14A       | KINESIN-LIKE PROTEIN A (KATA)                                                                                                                                                      |
| At_KatC    |         | AT5G54670.1 | BAA04674.1  | Kinesin-14   | 14A       | KINESIN-LIKE PROTEIN C (KATC)                                                                                                                                                      |
| At_KHC1    |         | AT3G63480.1 | NP_567148.1 | Kinesin-1    |           | KINESIN HEAVY CHAIN, PUTATIVE KINESIN HEAVY CHAIN, SYNCEPHALASTRUM RACEMOSUM, SWISSPROT:KINH_SYNRA                                                                                 |
| At_KLP2    |         | AT3G44050.1 | CAB88133.1  | Kinesin-15   |           | KINESIN MOTOR PROTEIN-RELATED KLP2 PROTEIN, XENOPUS LAEVIS, PIR:T30335                                                                                                             |
| At_MKRP1   |         | AT1G21730.1 | NP_173592.3 | Kinesin-7    |           | KINESIN-RELATED PROTEIN (MKRP1) SIMILAR TO GB U06698 NEURONAL KINESIN HEAVY CHAIN FROM HOMO SAPIENS AND CONTAINS A PF 00225 KINESIN MOTOR DOMAIN                                   |
| At_MKRP2   |         | AT4G39050.1 | AA13032.1   | Kinesin-7    |           | KINESIN-RELATED PROTEIN (MKRP2) KINESIN MOTOR PROTEIN - USTILAGO MAYDIS, PID:G2062750; IDENTICAL TO CDNA MKRP2 MRNA FOR KINESIN-RELATED PROTEIN GI:16902293                        |
| At_NACK1   |         | AT1G18370.1 | BAB88748.1  | Kinesin-7    |           | KINESIN MOTOR FAMILY PROTEIN (NACK1) SIMILAR TO KINESIN HEAVY CHAIN ISOLOG GB:AAB63609 GI:2262101 FROM [ARABIDOPSIS THALIANA]                                                      |
| At_NACK2   |         | AT3G43210.1 | CAD48111.1  | Kinesin-7    |           | KINESIN MOTOR FAMILY PROTEIN (NACK2) CONTAINS PFAM PROFILE: PF00225 KINESIN MOTOR DOMAIN                                                                                           |
| At_PAKRP1  |         | AT4G14150.1 | AAF78894.1  | Kinesin-15   |           | PHRAGMOPLAST-ASSOCIATED KINESIN-RELATED PROTEIN (PAKRP1)                                                                                                                           |
| At_PAKRP2  |         | AT4G14330.1 | AAL32294.1  | U/G          |           | PHRAGMOPLAST-ASSOCIATED KINESIN-RELATED PROTEIN 2 (PAKRP2) IDENTICAL TO CDNA PHRAGMOPLAST-ASSOCIATED KINESIN-RELATED PROTEIN 2 (PAKRP2) GI:16973450                                |

|            |       |             |             |              |           |                                                                                                                                      |
|------------|-------|-------------|-------------|--------------|-----------|--------------------------------------------------------------------------------------------------------------------------------------|
| At_zwichel |       | AT5G65930.1 | NP_851276.1 | Kinesin-14   |           | KINESIN-LIKE CALMODULIN-BINDING PROTEIN (ZWICHEL) IDENTICAL TO KINESIN-LIKE PROTEIN GI:2224925 FROM [ARABIDOPSIS THALIANA]           |
| Ce_BMK1    | KLP14 |             | NP_506582.1 | Kinesin-5    |           | BiMC Kinesin related, kinesin-like protein (108.3 kD) (bmk-1)                                                                        |
| Ce_KLP10   |       |             | NP_501291.1 | U/G          |           | kinesin-like protein (77.3 kD) (klp-10C) [Caenorhabditis elegans]                                                                    |
| Ce_KLP11   | KRP95 |             | CAD36488.1  | Kinesin-2    |           | Hypothetical protein F20C5.2b [Caenorhabditis elegans]                                                                               |
| Ce_KLP12   |       |             | NP_502142.1 | Kinesin-4/10 | Kinesin-4 | kinesin-like protein (klp-12) [Caenorhabditis elegans]                                                                               |
| Ce_KLP13   |       |             | NP_509001.2 | Kinesin-8    |           | kinesin-like protein (44.7 kD) (klp-13) [Caenorhabditis elegans]                                                                     |
| Ce_KLP15   |       |             | NP_491633.1 | Kinesin-14   |           | kinesin-like protein (64.1 kD) (klp-15) [Caenorhabditis elegans]                                                                     |
| Ce_KLP17   |       |             | NP_496446.2 | Kinesin-14   |           | kinesin-like protein (67.9 kD) (klp-17C) [Caenorhabditis elegans]                                                                    |
| Ce_KLP19   |       |             | NP_499742.1 | Kinesin-4/10 |           | kinesin-like protein (123.1 kD) (klp-19) [Caenorhabditis elegans]                                                                    |
| Ce_KLP20   | KRP85 |             | NP_497178.1 | Kinesin-2    |           | kinesin-like protein (73.5 kD) (klp-20) [Caenorhabditis elegans]                                                                     |
| Ce_KLP3    |       |             | NP_495646.1 | Kinesin-14   |           | kinesin-like protein (67.3 kD) (klp-3) [Caenorhabditis elegans]                                                                      |
| Ce_KLP4    |       |             | NP_508546.2 | Kinesin-3    |           | kinesin-like protein (klp-4) [Caenorhabditis elegans]                                                                                |
| Ce_KLP6    |       |             | NP_498069.1 | Kinesin-3    |           | kinesin-like protein (103.5 kD) (klp-6) [Caenorhabditis elegans]                                                                     |
| Ce_KLP7    |       |             | NP_499383.1 | Kinesin-13   |           | kinesin-like protein (83.3 kD) (klp-7) [Caenorhabditis elegans]                                                                      |
| Ce_OSM3    |       |             | P46873      | Kinesin-2    |           | OSM3_CAEEL Osmotic avoidance abnormal protein 3 (Kinesin-like protein osm-3)                                                         |
| Ce_UNC104  |       |             | P23678      | Kinesin-3    |           | UN104_CAEEL Kinesin-like protein unc-104 (Uncoordinated protein 104)                                                                 |
| Ce_UNC116  |       |             | NP_498842.1 | Kinesin-1    |           | UNCoordinated locomotion UNC-116, Kinesin Heavy Chain (91.9 kD) (unc-116) [Caenorhabditis elegans]                                   |
| Ce_ZEN4    |       |             | NP_741411.1 | Kinesin-6    |           | kinesin-like protein, Zygotic epidermal ENclosure defective ZEN-4 (87.7 kD) (zen-4) [Caenorhabditis elegans]                         |
| Cm_BimC    |       | CMC157C     |             | Kinesin-5    |           |                                                                                                                                      |
| Cm_CENP_E  |       | CMQ429C     |             | Kinesin-7    |           |                                                                                                                                      |
| Cm_KRP1    |       | CMO070C     |             | Kinesin-15   |           |                                                                                                                                      |
| Cm_KRP2    |       | CMT097C     |             | Kinesin-14   | 14A       |                                                                                                                                      |
| Cm_KRPC1   |       | CMR497C     |             | Kinesin-14   | 14B       |                                                                                                                                      |
| Cp_boursin |       |             | CAD98462.1  | Kinesin-5    |           | kinesin-like boursin, possible [Cryptosporidium parvum]                                                                              |
| Cp_KHC     |       |             | CAD98568.1  | Kinesin-1    |           | kinesin heavy chain, possible [Cryptosporidium parvum]                                                                               |
| Cp_KHC2    |       |             | CAD98483.1  | U/G          |           | putative kinesin heavy chain, possible [Cryptosporidium parvum]                                                                      |
| Cp_KHC3    |       |             | CAD98481.1  | U/G          |           | kinesin heavy chain, possible [Cryptosporidium parvum]                                                                               |
| Cp_Kip3    |       |             | EAK89501.1  | Kinesin-13   |           | centromere associated Kip3p, kinesin like P-loop NTPase that belongs to the TRAFAC class GTPase superfamily [Cryptosporidium parvum] |
| Cr_120136  |       | C_120136    |             | Kinesin-14   | 14A       |                                                                                                                                      |
| Cr_120157  |       | C_120157    |             | Kinesin-4/10 | Kinesin-4 |                                                                                                                                      |
| Cr_130219  |       | C_130219    |             | Kinesin-9    |           |                                                                                                                                      |
| Cr_1310024 |       | C_1310024   |             | Kinesin-8    |           |                                                                                                                                      |
| Cr_1350007 |       | C_1350007   |             | Kinesin-15   |           |                                                                                                                                      |
| Cr_1480016 |       | C_1480016   |             | Kinesin-7    |           |                                                                                                                                      |
| Cr_250150  |       | C_250150    |             | Kinesin-9    |           |                                                                                                                                      |
| Cr_260066  |       | C_260066    |             | Kinesin-12   |           |                                                                                                                                      |
| Cr_300121  |       | C_300121    |             | Kinesin-7    |           |                                                                                                                                      |
| Cr_340020  |       | C_340020    |             | Kinesin-4/10 | Kinesin-4 |                                                                                                                                      |
| Cr_510041  |       | C_510041    |             | Kinesin-14   | 14B       |                                                                                                                                      |
| Cr_530027  |       | C_530027    |             | Kinesin-5    |           |                                                                                                                                      |
| Cr_570090  |       | C_570090    |             | Kinesin-4/10 |           |                                                                                                                                      |
| Cr_60218   |       | C_60218     |             | Kinesin-14   | 14A       |                                                                                                                                      |
| Cr_620070  |       | C_620070    |             | Kinesin-12   |           |                                                                                                                                      |
| Cr_670066  |       | C_670066    |             | Kinesin-14   |           |                                                                                                                                      |
| Cr_70192   |       | C_70192     |             | U/G          |           |                                                                                                                                      |
| Cr_710026  |       | C_710026    |             | Kinesin-16   |           |                                                                                                                                      |
| Cr_730040  |       | C_730040    |             | Kinesin-13   |           |                                                                                                                                      |
| Cr_790050  |       | C_790050    |             | U/G          |           |                                                                                                                                      |
| Cr_930065  |       | C_930065    |             | Kinesin-7    |           |                                                                                                                                      |
| Cr_FLA10   |       | C_1880008   | P46869      | Kinesin-2    |           | FLA10_CHLRE Kinesin-like protein FLA10 (KHP1 protein)                                                                                |
| Cr_FLA8    |       | C_160226    |             | Kinesin-2    |           |                                                                                                                                      |
| Cr_IAR1    |       | C_260133    | BAC77723.1  | Kinesin-4/10 |           | lar1 InvA related Kinesin [Chlamydomonas reinhardtii]                                                                                |
| Cr_KLP1    |       | C_50080     | CAA55326.1  | Kinesin-9    |           | kinesin-like protein [Chlamydomonas reinhardtii]                                                                                     |
| Dd_Kif1    |       | DDB0189215  | AAF63384.1  | Kinesin-3    |           | kinesin Unc104/KIF1a homolog [Dictyostelium discoideum]                                                                              |
| Dd_Kif10   |       | DDB0219839  | XP_629230.1 | Kinesin-8    |           | hypothetical protein DDB0215386 [Dictyostelium discoideum]                                                                           |
| Dd_Kif11   |       | DDB0189194  | XP_635435.1 | Kinesin-7    |           | hypothetical protein DDB0201556 [Dictyostelium discoideum]                                                                           |
| Dd_Kif12   |       | DDB0189854  | XP_647633.1 | Kinesin-6    |           | hypothetical protein DDB0201555 [Dictyostelium discoideum]                                                                           |
| Dd_Kif13   | Eg5   | DDB0187903  | XP_636780.1 | Kinesin-5    |           | hypothetical protein DDB0201557 [Dictyostelium discoideum]                                                                           |
| Dd_Kif2    | K2    | DDB0189377  | XP_647135.1 | Kinesin-14   | 14A       | kinesin-related protein K2 [Dictyostelium discoideum]                                                                                |

|                 |         |                       |             |              |                                                                       |
|-----------------|---------|-----------------------|-------------|--------------|-----------------------------------------------------------------------|
| Dd_Kif3         | kin3    | DDB0204045            | XP_640847.1 | Kinesin-1    | kinesin 3 [Dictyostelium discoideum]                                  |
| Dd_Kif4         | kin4    | DDB0186344            | XP_639868.1 | Kinesin-7    | kinesin 4 [Dictyostelium discoideum]                                  |
| Dd_Kif5         | kin5    | DDB0166988            | BAC56910.1  | Kinesin-1    | kinesin-related protein DdKin5 [Dictyostelium discoideum]             |
| Dd_Kif6         | kin6    | DDB0216601            | XP_647667.1 | Kinesin-13   | kinesin 6 [Dictyostelium discoideum]                                  |
| Dd_Kif7         | K7      |                       | XP_640581.1 | Kinesin-1    | K7 kinesin-like protein [Dictyostelium discoideum]                    |
| Dd_Kif8         | kin8    | DDB0218612            | XP_638546.1 | Kinesin-4/10 | kinesin 8 [Dictyostelium discoideum]                                  |
| Dd_Kif9         |         | DDB0217523            | XP_644079.1 | Kinesin-1    | hypothetical protein DDB0185204 [Dictyostelium discoideum]            |
| Dm_CENP_ana     |         | CG32955-PE            | AF220354_1  | Kinesin-7    | mitotic kinesin-like motor protein CENP-ana [Drosophila melanogaster] |
| Dm_CENP_meta    |         | CG6392-PA             | NP_524993.2 | Kinesin-7    | CG6392-PA [Drosophila melanogaster]                                   |
| Dm_KHC          |         | CG7765-PA             | P17210      | Kinesin-1    | KINH_DROME Kinesin heavy chain                                        |
| Dm_Kif19A       |         | CG9913-PA             | NP_650337.1 | Kinesin-8    | CG9913-PA [Drosophila melanogaster]                                   |
| Dm_Kif3C        |         | CG17461-PA            | NP_651939.3 | Kinesin-2    | CG17461-PA [Drosophila melanogaster]                                  |
| Dm_Kin73        |         | CG8183-PA             | NP_609201.3 | Kinesin-3    | CG8183-PA [Drosophila melanogaster]                                   |
| Dm_KLP10A       |         | CG1453-PA             | NP_572687.1 | Kinesin-13   | CG1453-PA [Drosophila melanogaster]                                   |
| Dm_KLP31E       |         | CG5300-PA             | NP_609398.2 | Kinesin-4/10 | CG5300-PA [Drosophila melanogaster]                                   |
| Dm_KLP38B       |         | CG10718-PA            | NP_476817.1 | Kinesin-3    | CG10718-PA [Drosophila melanogaster]                                  |
| Dm_KLP3A        |         | CG8590-PA             | NP_525053.1 | Kinesin-4/10 | CG8590-PA [Drosophila melanogaster]                                   |
| Dm_KLP54D       |         | CG15844-PA            | NP_524883.1 | Kinesin-12   | CG15844-PA [Drosophila melanogaster]                                  |
| Dm_KLP59C       |         | CG3219-PA             | NP_611759.1 | Kinesin-13   | CG3219-PA [Drosophila melanogaster]                                   |
| Dm_KLP59D       |         | CG12192-PA            | NP_611762.1 | Kinesin-13   | CG12192-PA [Drosophila melanogaster]                                  |
| Dm_KLP61F       | KRP-130 | CG9191-PA             | P46863      | Kinesin-5    | KL61_DROME Bipolar kinesin KRP-130 (Kinesin-like protein Klp61F)      |
| Dm_KLP64D       |         | CG10642-PA            | NP_523934.1 | Kinesin-2    | CG10642-PA [Drosophila melanogaster]                                  |
| Dm_KLP67A       |         | CG10923-PA            | AAF50296.1  | Kinesin-8    | CG10923-PA [Drosophila melanogaster]                                  |
| Dm_KLP68D       |         | CG7293-PA             | P46867      | Kinesin-2    | KL68_DROME Kinesin-like protein KLP68D                                |
| Dm_KLP98A       |         | CG5658-PA             | NP_524532.2 | Kinesin-3    | CG5658-PA [Drosophila melanogaster]                                   |
| Dm_Ncd          |         | CG7831-PA             | P20480      | Kinesin-14   | 14A NCD_DROME Claret segregational protein                            |
| Dm_Nod          |         | CG1763-PA             | P18105      | Kinesin-4/10 | NOD_DROME Kinesin-like protein Nod                                    |
| Dm_Pav          |         | CG1258-PA             | NP_477025.1 | Kinesin-6    | CG1258-PA [Drosophila melanogaster]                                   |
| Dm_Sub          |         | CG12298-PA            | NP_611260.1 | Kinesin-6    | CG12298-PA [Drosophila melanogaster]                                  |
| Dm_Unc104       |         | CG8566-PD             | AAF74192.1  | Kinesin-3    | kinesin superfamily member DUnc104 [Drosophila melanogaster]          |
| Ec_KLP1         |         |                       | NP_597346.1 | Kinesin-4/10 | KINESIN-LIKE PROTEIN [Encephalitozoon cuniculi]                       |
| Ec_KLP2         |         |                       | NP_597219.1 | Kinesin-15   | KINESIN-LIKE PROTEIN [Encephalitozoon cuniculi]                       |
| Ec_KLP3         |         |                       | NP_586508.1 | U/G          | KINESIN-LIKE DNA-BINDING PROTEIN [Encephalitozoon cuniculi]           |
| Ec_KLP4         |         |                       | NP_586147.1 | Kinesin-14   | 14A similarity to KINESIN-LIKE PROTEIN A [Encephalitozoon cuniculi]   |
| Ec_KRP1         |         |                       | NP_586353.1 | Kinesin-13   | KINESIN-RELATED PROTEIN [Encephalitozoon cuniculi]                    |
| Ec_KRP2         |         |                       | NP_586215.1 | U/G          | KINESIN-RELATED PROTEIN [Encephalitozoon cuniculi]                    |
| Eh_KLP1         |         | 163.m00094            | XP_651474.1 | Kinesin-14   | 14A Entamoeba histolytica[chr unknown]  Auto                          |
| Eh_KLP3         |         | 8.m00361              | XP_656748.1 | Kinesin-15   | Entamoeba histolytica[chr unknown]  Auto                              |
| Eh_KLP5         |         | 302.m00044            | XP_649446.1 | Kinesin-5    | Entamoeba histolytica[chr unknown]  Auto                              |
| Eh_KLP6         |         | 299.m00041            | XP_649467.1 | U/G          | Entamoeba histolytica[chr unknown]  Auto                              |
| GI_boursin_like |         | GLP_714_21038_23809   | EAA38071.1  | U/G          | GLP_714_21038_23809 [Giardia lamblia ATCC 50803]                      |
| GI_Kin_like     |         | GLP_622_16388_13269   | EAA38307.1  | U/G          | GLP_622_16388_13269 [Giardia lamblia ATCC 50803]                      |
| GI_Kin_like2    |         | GLP_714_26114_29632   | EAA38074.1  | Kinesin-14   | GLP_714_26114_29632 [Giardia lamblia ATCC 50803]                      |
| GI_kip2p_like   |         | GLP_554_82174_85758   | EAA41768.1  | U/G          | GLP_554_82174_85758 [Giardia lamblia ATCC 50803]                      |
| GI_KLP1         |         | GLP_532_25573_23183   | EAA39297.1  | U/G          | GLP_532_25573_23183 [Giardia lamblia ATCC 50803]                      |
| GI_KLP10        |         | GLP_254_3872_6385     | EAA42074.1  | Kinesin-16   | GLP_254_3872_6385 [Giardia lamblia ATCC 50803]                        |
| GI_KLP11        |         | GLP_302_1383_4583     | EAA39125.1  | Kinesin-5    | GLP_302_1383_4583 [Giardia lamblia ATCC 50803]                        |
| GI_KLP12        |         | GLP_554_26297_23580   | EAA41725.1  | U/G          | GLP_554_26297_23580 [Giardia lamblia ATCC 50803]                      |
| GI_KLP13        |         | GLP_164_5127_2983     | EAA40236.1  | Kinesin-13   | GLP_164_5127_2983 [Giardia lamblia ATCC 50803]                        |
| GI_KLP2         |         | GLP_480_88069_85913   | EAA42178.1  | Kinesin-2    | GLP_480_88069_85913 [Giardia lamblia ATCC 50803]                      |
| GI_KLP3         |         | GLP_572_50389_48461   | EAA40017.1  | Kinesin-2    | GLP_572_50389_48461 [Giardia lamblia ATCC 50803]                      |
| GI_KLP4         |         | GLP_487_29412_32582   | EAA42594.1  | Kinesin-4/10 | GLP_487_29412_32582 [Giardia lamblia ATCC 50803]                      |
| GI_KLP5         |         | GLP_426_10885_8552    | EAA37942.1  | Kinesin-16   | GLP_426_10885_8552 [Giardia lamblia ATCC 50803]                       |
| GI_KLP6_2       |         | GLP_9_6596_9676       | EAA38281.1  | Kinesin-3    | GLP_9_6596_9676 [Giardia lamblia ATCC 50803]                          |
| GI_KLP6_3       |         | GLP_9_1234_4455       | EAA38278.1  | Kinesin-3    | GLP_9_1234_4455 [Giardia lamblia ATCC 50803]                          |
| GI_KLP7         |         | GLP_12_35203_32264    | EAA41017.1  | Kinesin-1    | GLP_12_35203_32264 [Giardia lamblia ATCC 50803]                       |
| GI_KLP8         |         | GLP_44_27536_25659    | EAA38123.1  | Kinesin-14   | 14A GLP_44_27536_25659 [Giardia lamblia ATCC 50803]                   |
| GI_KLP9         |         | GLP_587_103657_101387 | EAA42508.1  | Kinesin-9    | GLP_587_103657_101387 [Giardia lamblia ATCC 50803]                    |
| GI_KRP_like1    |         | GLP_436_17803_15257   | EAA38723.1  | U/G          | GLP_436_17803_15257 [Giardia lamblia ATCC 50803]                      |
| Hs_CENP_E       |         |                       | Q02224      | Kinesin-7    | CENE_HUMAN Centromeric protein E (CENP-E protein)                     |

|           |             |             |              |           |                                                                                                                                                                                         |
|-----------|-------------|-------------|--------------|-----------|-----------------------------------------------------------------------------------------------------------------------------------------------------------------------------------------|
| Hs_Kif11  |             | P52732      | Kinesin-5    |           | KF11_HUMAN Kinesin-like protein KIF11 (Kinesin-related motor protein Eg5) (Kinesin-like spindle protein HKSP) (Thyroid receptor interacting protein 5) (TRIP5) (Kinesin-like protein 1) |
| Hs_Kif12  |             | Q96FN5      | Kinesin-12   |           | KF12_HUMAN Kinesin-like protein KIF12                                                                                                                                                   |
| Hs_Kif13A |             | Q9H1H9      | Kinesin-3    |           | K13A_HUMAN Kinesin-like protein KIF13A (Kinesin-like protein RBKIN)                                                                                                                     |
| Hs_Kif13B |             | Q9NQT8      | Kinesin-3    |           | K13B_HUMAN Kinesin-like protein KIF13B (Kinesin-like protein GAKIN)                                                                                                                     |
| Hs_Kif14  |             | Q15058      | Kinesin-3    |           | KF14_HUMAN Kinesin-like protein KIF14                                                                                                                                                   |
| Hs_Kif15  |             | BAB03309.1  | Kinesin-15   |           | kinesin-like protein 2 [Homo sapiens]                                                                                                                                                   |
| Hs_Kif16  |             | AAO17292.1  | Kinesin-3    |           | kinesin motor protein [Homo sapiens]                                                                                                                                                    |
| Hs_Kif17  |             | NP_065867.1 | Kinesin-2    |           | kinesin family member 17; kinesin-like protein KIF17; KIF3-related motor protein [Homo sapiens]                                                                                         |
| Hs_Kif18  |             | BAB93508.1  | Kinesin-8    |           | OK/SW-CL.108 [Homo sapiens]                                                                                                                                                             |
| Hs_Kif19  |             | NP_694941.1 | Kinesin-8    |           | hypothetical protein FLJ37300 [Homo sapiens]                                                                                                                                            |
| Hs_Kif1A  |             | NP_004312.2 | Kinesin-3    |           | axonal transport of synaptic vesicles; kinesin, heavy chain, member 1A, homolog of mouse [Homo sapiens]                                                                                 |
| Hs_Kif1C  |             | O43896      | Kinesin-3    |           | KF1C_HUMAN Kinesin-like protein KIF1C                                                                                                                                                   |
| Hs_Kif2   |             | O00139      | Kinesin-13   |           | KIF2_HUMAN Kinesin-like protein KIF2 (Kinesin-2) (HK2)                                                                                                                                  |
| Hs_Kif20A |             | O95235      | Kinesin-6    |           | K20A_HUMAN Kinesin family member 20A (Rabkinesin-6) (Rab6-interacting kinesin-like protein) (GG10_2)                                                                                    |
| Hs_Kif20B |             | CAB55962.1  | Kinesin-6    |           | hypothetical protein [Homo sapiens]                                                                                                                                                     |
| Hs_Kif21A |             | NP_060111.2 | Kinesin-4/10 | Kinesin-4 | kinesin family member 21A; NY-REN-62 antigen [Homo sapiens]                                                                                                                             |
| Hs_Kif21B |             | XP_371332.1 | Kinesin-4/10 | Kinesin-4 | kinesin family member 21B [Homo sapiens]                                                                                                                                                |
| Hs_Kif22  |             | Q14807      | U/G          |           | KF22_HUMAN Kinesin-like protein KIF22 (Kinesin-like DNA-binding protein) (Kinesin-like protein 4)                                                                                       |
| Hs_Kif23  |             | NP_612565.1 | Kinesin-6    |           | kinesin family member 23 isoform 1; mitotic kinesin-like 1; kinesin-like 5 (mitotic kinesin-like protein 1) [Homo sapiens]                                                              |
| Hs_Kif25  |             | Q9UIL4      | Kinesin-14   |           | KNS3_HUMAN Kinesin-like protein 3                                                                                                                                                       |
| Hs_Kif3A  |             | Q9Y496      | Kinesin-2    |           | KF3A_HUMAN Kinesin-like protein KIF3A (Microtubule plus end-directed kinesin motor 3A)                                                                                                  |
| Hs_Kif3B  |             | O15066      | Kinesin-2    |           | KF3B_HUMAN Kinesin-like protein KIF3B (Microtubule plus end-directed kinesin motor 3B) (HH0048)                                                                                         |
| Hs_Kif3C  |             | NP_002245.4 | Kinesin-2    |           | kinesin family member 3C [Homo sapiens]                                                                                                                                                 |
| Hs_Kif4A  |             | O95239      | Kinesin-4/10 | Kinesin-4 | KF4A_HUMAN Chromosome-associated kinesin KIF4A (Chromokinesin)                                                                                                                          |
| Hs_Kif9   |             | AF311212_1  | Kinesin-9    |           | kinesin protein 9 [Homo sapiens]                                                                                                                                                        |
| Hs_KifC1  |             | Q9BW19      | Kinesin-14   | 14A       | KFC1_HUMAN Kinesin-like protein KIFC1 (Kinesin-like protein 2) (Kinesin-related protein HSET)                                                                                           |
| Hs_KifC2  |             | Q96AC6      | Kinesin-14   |           | KFC2_HUMAN Kinesin-like protein KIFC2                                                                                                                                                   |
| Hs_KifC3  |             | Q9BVG8      | Kinesin-14   |           | KFC3_HUMAN Kinesin-like protein KIFC3                                                                                                                                                   |
| Hs_MCAK   |             | Q99661      | Kinesin-13   |           | KF2C_HUMAN Kinesin-like protein KIF2C (Mitotic centromere-associated kinesin) (MCAK) (Kinesin-like protein 6)                                                                           |
| Hs_ukHC   |             | P33176      | Kinesin-1    |           | KINH_HUMAN Kinesin heavy chain (Ubiquitous kinesin heavy chain) (UKHC)                                                                                                                  |
| Lm01.0030 | LmjF01.0030 |             | Kinesin-13   |           |                                                                                                                                                                                         |
| Lm05.0630 | LmjF05.0630 | CAJ01983.1  | Kinesin-9    |           | kinesin, putative [Leishmania major]                                                                                                                                                    |
| Lm05.0760 | LmjF05.0760 | CAJ01996.1  | U/G          |           | kinesin-like protein [Leishmania major]                                                                                                                                                 |
| Lm06.0180 | LmjF06.0180 | CAJ02061.1  | Kinesin-12   |           | kinesin-like protein [Leishmania major]                                                                                                                                                 |
| Lm06.1030 | LmjF06.1030 | CAJ02150.1  | Kinesin-4/10 |           | kinesin, putative [Leishmania major]                                                                                                                                                    |
| Lm09.0120 | LmjF09.0120 | CAJ02331.1  | Kinesin-4/10 |           | kinesin, putative [Leishmania major]                                                                                                                                                    |
| Lm11.0870 | LmjF11.0870 | CAJ02823.1  | U/G          |           | kinesin, putative [Leishmania major]                                                                                                                                                    |
| Lm13.0130 | LmjF13.0130 | CAJ02423.1  | Kinesin-13   |           | MCAK-like kinesin, putative [Leishmania major]                                                                                                                                          |
| Lm13.1610 | LmjF13.1610 | CAJ03179.1  | Kinesin-13   |           | MCAK-like kinesin, putative [Leishmania major]                                                                                                                                          |
| Lm14.0810 | LmjF14.0810 | CAJ03062.1  | Tryp2        |           | kinesin, putative [Leishmania major]                                                                                                                                                    |
| Lm14.1100 | LmjF14.1100 | CAJ03170.1  | Tryp2        |           | kinesin K39, putative [Leishmania major]                                                                                                                                                |
| Lm16.1470 | LmjF16.1470 | CAJ04113.1  | U/G          |           | kinesin, putative [Leishmania major]                                                                                                                                                    |
| Lm16.1580 | LmjF16.1580 | CAJ04188.1  | Tryp1        |           | kinesin, putative [Leishmania major]                                                                                                                                                    |
| Lm17.0800 | LmjF17.0800 | CAJ03677.1  | Kinesin-2    |           | OSM3-like kinesin, putative [Leishmania major]                                                                                                                                          |
| Lm17.1110 | LmjF17.1110 | CAJ03849.1  | U/G          |           | kinesin, putative [Leishmania major]                                                                                                                                                    |
| Lm18.1600 | LmjF18.1600 | CAJ04343.1  | U/G          |           | kinesin, putative [Leishmania major]                                                                                                                                                    |
| Lm19.0260 | LmjF19.0260 | CAJ07111.1  | Kinesin-14   | 14B       | C-terminal motor kinesin, putative [Leishmania major]                                                                                                                                   |
| Lm19.0680 | LmjF19.0680 | CAJ07153.1  | Tryp2        |           | kinesin, putative [Leishmania major]                                                                                                                                                    |
| Lm19.0700 | LmjF19.0700 | CAJ07155.1  | Tryp2        |           | kinesin, putative [Leishmania major]                                                                                                                                                    |
| Lm20.0640 | LmjF20.0640 | CAJ03791.1  | Kinesin-1    |           | kinesin heavy chain, putative [Leishmania major]                                                                                                                                        |
| Lm21.1040 | LmjF21.1040 | CAJ04508.1  | Tryp2        |           | kinesin, putative [Leishmania major]                                                                                                                                                    |
| Lm22.0560 | LmjF22.0560 | CAJ04177.1  | U/G          |           | kinesin, putative [Leishmania major]                                                                                                                                                    |
| Lm22.0960 | LmjF22.0960 | CAJ04407.1  | Tryp2        |           | kinesin, putative [Leishmania major]                                                                                                                                                    |
| Lm23.0560 | LmjF23.0560 | CAJ04289.1  | Tryp2        |           | kinesin, putative [Leishmania major]                                                                                                                                                    |
| Lm24.0640 | LmjF24.0640 | CAJ04358.1  | Kinesin-13   |           | MCAK-like kinesin, putative [Leishmania major]                                                                                                                                          |
| Lm24.1430 | LmjF24.1430 | CAJ05025.1  | Tryp1        |           | kinesin, putative [Leishmania major]                                                                                                                                                    |
| Lm25.1950 | LmjF25.1950 | CAJ05486.1  | U/G          |           | kinesin, putative [Leishmania major]                                                                                                                                                    |
| Lm25.1970 | LmjF25.1970 | CAJ05490.1  | Kinesin-16   |           | kinesin, putative [Leishmania major]                                                                                                                                                    |
| Lm28.1850 | LmjF28.1850 | CAJ05561.1  | Kinesin-14   | 14A       | C-terminal motor kinesin, putative [Leishmania major]                                                                                                                                   |
| Lm29.0970 | LmjF29.0970 | AAZ09553.1  | Tryp2        |           | kinesin, putative [Leishmania major]                                                                                                                                                    |

K39

|               |       |               |              |              |     |                                                                                      |
|---------------|-------|---------------|--------------|--------------|-----|--------------------------------------------------------------------------------------|
| Lm29.2380     |       | LmjF29.2380   | AAZ09695.1   | Tryp2        |     | kinesin, putative [Leishmania major]                                                 |
| Lm30.0350     |       | LmjF30.0350   | CAJ05848.1   | U/G          |     | kinesin, putative [Leishmania major]                                                 |
| Lm30.1450     |       | LmjF30.1450   | CAJ06233.1   | Tryp1        |     | kinesin, putative [Leishmania major]                                                 |
| Lm30.3060     |       | LmjF30.3060   | CAJ06716.1   | U/G          |     | kinesin, putative [Leishmania major]                                                 |
| Lm31.0290     |       | LmjF31.0290   | CAJ08216.1   | Kinesin-13   |     | mitotic centromere-associated kinesin (MCAK), putative                               |
| Lm32.0680     |       | LmjF32.0680   | CAJ08563.1   | Kinesin-2    |     | OSM3-like kinesin, putative [Leishmania major]                                       |
| Lm33.2140     |       | LmjF33.2140   | CAJ06568.1   | U/G          |     | kinesin, putative [Leishmania major]                                                 |
| Lm33.2560     |       | LmjF33.2560   | CAJ06703.1   | Kinesin-3    |     | Unc104-like kinesin, putative [Leishmania major]                                     |
| Lm34.1540     |       | LmjF34.1540   | CAJ07865.1   | Kinesin-12   |     | kinesin, putative [Leishmania major]                                                 |
| Lm34.4260     |       | LmjF34.4260   | CAJ08160.1   | Kinesin-3    |     | Unc104-like kinesin, putative [Leishmania major]                                     |
| Lm35.2090     |       | LmjF35.2090   |              | Tryp1        |     |                                                                                      |
| Pf_KLP1       |       | PF11_0478     | NP_701334.1  | U/G          |     | hypothetical protein Plasmodium falciparum chr 11 TIGR  Manual                       |
| Pf_KLP2       |       | PF07_0104     | NP_704182.1  | U/G          |     | kinesin-like protein, putative Plasmodium falciparum chr 7 SANGER  Manual            |
| Pf_KLP3       |       | PFC0770c      | NP_473287.1  | Kinesin-5    |     | kinesin-related protein, putative Plasmodium falciparum chr 3 SANGER  Manual         |
| Pf_KLP4       |       | PFC0860w      | NP_473306.1  | Kinesin-8    |     | kinesin, putative Plasmodium falciparum chr 3 SANGER  Manual                         |
| Pf_KLP5       |       | PFA0535c      | NP_703310.1  | Kinesin-8    |     | kinesin, putative Plasmodium falciparum chr 1 SANGER  Manual                         |
| Pf_KLP7       |       | PFL0545w      | NP_701474.1  | U/G          |     | kinesin-related protein, putative Plasmodium falciparum chr 12 STANFORD  Manual      |
| Pf_KLP8       |       | PFL2165w      | NP_701793.1  | Kinesin-13   |     | kinesin-like protein, putative Plasmodium falciparum chr 12 STANFORD  Manual         |
| Pf_KLP9       |       | PFL2190c      | NP_701798.1  | U/G          |     | hypothetical protein Plasmodium falciparum chr 12 STANFORD  Manual                   |
| Sc_Cin8       |       | YEL061C       | P27895       | Kinesin-5    |     | CIN8  kinesin-related protein Saccharomyces cerevisiae chr 5   Manual                |
| Sc_Kar3       |       | YPR141C       | AAB68281.1   | Kinesin-14   | 14A | KAR3  kinesin-related protein Saccharomyces cerevisiae chr 16   Manual               |
| Sc_Kip1       |       | YBL063W       | CAA78019.1   | Kinesin-5    |     | KIP1  kinesin-related protein Saccharomyces cerevisiae chr 2   Manual                |
| Sc_Kip2       |       | YPL155C       | CAA78021.1   | U/G          |     | KIP2  kinesin-related protein Saccharomyces cerevisiae chr 16   Manual               |
| Sc_Kip3       |       | YGL216W       | CAA96933.1   | Kinesin-8    |     | KIP3  kinesin-related protein Saccharomyces cerevisiae chr 7   Manual                |
| Sc_Smy1       |       | YKL079W       | CAA81916.1   | U/G          |     | SMY1  kinesin-related protein Saccharomyces cerevisiae chr 11   Manual               |
| Sp_Cut7       |       | SPAC25G10.07c | CAA94636.1   | Kinesin-5    |     | cut7  kinesin-like protein Schizosaccharomyces pombe chr 1   Manual                  |
| Sp_KLP3       | krp1  | SPAC1834.07   | CAB75775.1   | Kinesin-1    |     | kip3 krp1 kinesin-like protein Schizosaccharomyces pombe chr 1   Manual              |
| Sp_KLP5       |       | SPBC2F12.13   | CAB10160.1   | Kinesin-8    |     | kip5 sot1 kinesin-like protein Schizosaccharomyces pombe chr 2   Manual              |
| Sp_KLP6       |       | SPBC1685.15c  | CAA19043.1   | Kinesin-8    |     | kip6 sot2. SPBC649.01c kinesin-like protein Schizosaccharomyces pombe chr 2   Manual |
| Sp_KLP8       |       | SPAC144.14    | CAB59694.1   | U/G          |     | kip8  kinesin-like protein Schizosaccharomyces pombe chr 1   Manual                  |
| Sp_Pkl1       |       | SPAC3A11.14c  | CAB16597.1   | Kinesin-14   | 14A | pk1 kip1. SPAC3H5.03c kinesin-like protein Schizosaccharomyces pombe chr 1   Manual  |
| Sp_spac664.10 |       | SPAC664.10    | NP_593458.1  | Kinesin-14   | 14A | kinesin-like protein Schizosaccharomyces pombe chr 1   Manual                        |
| Sp_sbc15d4    |       | SPBC15D4.01c  | NP_596241.2  | Kinesin-6    |     | kinesin-like protein Schizosaccharomyces pombe chr 2   Manual                        |
| Sp_Tea2       |       | SPBC1604.20c  | CAA22353.1   | U/G          |     | tea2 kip4 kinesin-like protein Schizosaccharomyces pombe chr 2   Manual              |
| Ta_KLP1       |       |               | CAI74297.1   | Kinesin-13   |     | kinesin-like protein, putative Theileria annulata chr 02   Manual                    |
| Ta_KLP2       |       |               | CAI72998.1   | Kinesin-8    |     | kinesin, putative Theileria annulata chr 01   Manual                                 |
| Tb09.160.2260 |       | Tb09.160.2260 |              | Kinesin-13   |     |                                                                                      |
| Tb09.244.2560 |       | Tb09.244.2560 |              | Tryp1        |     |                                                                                      |
| Tb10.61.0990  |       | Tb10.61.0990  |              | Tryp2        |     |                                                                                      |
| Tb10.61.1020  |       | Tb10.61.1020  |              | Tryp2        |     |                                                                                      |
| Tb10.61.1750  | KIFC1 | Tb10.61.1750  | AAG33641.1   | Kinesin-14   | 14B | C-terminal kinesin KIFC1 [Trypanosoma brucei]                                        |
| Tb10.70.6990  |       | Tb10.70.6990  |              | Tryp2        |     |                                                                                      |
| Tb10.70.7260  |       | Tb10.70.7260  |              | U/G          |     |                                                                                      |
| Tb11.01.0850  |       | Tb11.01.0850  |              | Kinesin-14   | 14A |                                                                                      |
| Tb11.01.3990  |       | Tb11.01.3990  |              | Kinesin-4/10 |     |                                                                                      |
| Tb11.01.5490  |       | Tb11.01.5490  |              | Kinesin-2    |     |                                                                                      |
| Tb11.02.0090  |       | Tb11.02.0090  |              | Kinesin-3    |     |                                                                                      |
| Tb11.02.0400  |       | Tb11.02.0400  |              | U/G          |     |                                                                                      |
| Tb11.02.0790  |       | Tb11.02.0790  |              | Kinesin-13   |     |                                                                                      |
| Tb11.02.2260  |       | Tb11.02.2260  |              | Kinesin-13   |     |                                                                                      |
| Tb11.02.2970  |       | Tb11.02.2970  |              | Kinesin-13   |     |                                                                                      |
| Tb11.02.4260  |       | Tb11.02.4260  |              | U/G          |     |                                                                                      |
| Tb927.1.1350  |       | Tb927.1.1350  | CAB95414.1   | Kinesin-1    |     | kinesin heavy chain isoform 5c, probable [Trypanosoma brucei]                        |
| Tb927.3.2020  |       | Tb927.3.2020  | AAX80230.1   | U/G          |     | kinesin, putative [Trypanosoma brucei]                                               |
| Tb927.3.2040  |       | Tb927.3.2040  | AAX80232.1   | Kinesin-16   |     | kinesin, putative [Trypanosoma brucei]                                               |
| Tb927.3.3390  |       | Tb927.3.3390  | Tb927.3.3390 | Tryp2        |     | kinesin, putative [Trypanosoma brucei]                                               |
| Tb927.3.4960  |       | Tb927.3.4960  | AAX80664.1   | Tryp2        |     | kinesin, putative [Trypanosoma brucei]                                               |
| Tb927.4.2730  |       | Tb927.4.2730  | AAX80814.1   | Kinesin-12   |     | kinesin-like protein, putative [Trypanosoma brucei]                                  |
| Tb927.4.3910  |       | Tb927.4.3910  | AAX69505.1   | Kinesin-13   |     | mitotic centromere-associated kinesin (MCAK), putative [Trypanosoma brucei]          |
| Tb927.5.1700  |       | Tb927.5.1700  | AAX79088.1   | Kinesin-2    |     | OSM3-like kinesin, putative [Trypanosoma brucei]                                     |
| Tb927.5.2410  |       | Tb927.5.2410  | AAX80445.1   | U/G          |     | kinesin, putative [Trypanosoma brucei]                                               |

|              |     |              |            |              |                                                                 |
|--------------|-----|--------------|------------|--------------|-----------------------------------------------------------------|
| Tb927.6.1770 |     | Tb927.6.1770 | AAX79697.1 | U/G          | kinesin, putative [Trypanosoma brucei]                          |
| Tb927.6.4390 |     | Tb927.6.4390 | AAX79272.1 | U/G          | kinesin, putative [Trypanosoma brucei]                          |
| Tb927.7.3000 |     | Tb927.7.3000 | AAZ12364.1 | Tryp2        | kinesin, putative [Trypanosoma brucei]                          |
| Tb927.7.3830 | K39 | Tb927.7.3830 | AAZ12447.1 | Tryp2        | kinesin K39, putative [Trypanosoma brucei]                      |
| Tb927.7.4830 |     | Tb927.7.4830 | AAZ12547.1 | Kinesin-12   | kinesin, putative [Trypanosoma brucei]                          |
| Tb927.7.5650 |     | Tb927.7.5650 | AAZ78851.1 | Kinesin-4/10 | kinesin, putative [Trypanosoma brucei]                          |
| Tb927.7.6290 |     | Tb927.7.6290 | AAZ12693.1 | Kinesin-9    | kinesin, putative [Trypanosoma brucei]                          |
| Tb927.7.7120 |     | Tb927.7.7120 | AAZ12773.1 | U/G          | kinesin, putative [Trypanosoma brucei]                          |
| Tb927.7.7260 |     | Tb927.7.7260 | AAZ12787.1 | Kinesin-9    | kinesin, putative [Trypanosoma brucei]                          |
| Tb927.8.2630 |     | Tb927.8.2630 | AAZ13030.1 | Tryp2        | kinesin, putative [Trypanosoma brucei]                          |
| Tb927.8.4840 |     | Tb927.8.4840 | AAZ13248.1 | Tryp1        | kinesin, putative [Trypanosoma brucei]                          |
| Tb927.8.4950 |     | Tb927.8.4950 | AAZ13259.1 | U/G          | kinesin, putative [Trypanosoma brucei]                          |
| Tp_105812    |     | Tp_105812    |            | U/G          |                                                                 |
| Tp_10932     |     | Tp_10932     |            | Kinesin-2    |                                                                 |
| Tp_110182    |     | Tp_110182    |            | Kinesin-4/10 |                                                                 |
| Tp_112325    |     | Tp_112325    |            | Kinesin-13   |                                                                 |
| Tp_116492    |     | Tp_116492    |            | Kinesin-13   |                                                                 |
| Tp_119229    |     | Tp_119229    |            | Kinesin-4/10 |                                                                 |
| Tp_12124     |     | Tp_12124     |            | Kinesin-14   |                                                                 |
| Tp_121289    |     | Tp_121289    |            | Kinesin-7    |                                                                 |
| Tp_122963    |     | Tp_122963    |            | Kinesin-14   |                                                                 |
| Tp_124560    |     | Tp_124560    |            | Kinesin-14   | 14A                                                             |
| Tp_132625    |     | Tp_132625    |            | Kinesin-15   |                                                                 |
| Tp_133437    |     | Tp_133437    |            | Kinesin-1    |                                                                 |
| Tp_135880    |     | Tp_135880    |            | Kinesin-5    |                                                                 |
| Tp_137385    |     | Tp_137385    |            | Kinesin-6    |                                                                 |
| Tp_142737    |     | Tp_142737    |            | Kinesin-9    |                                                                 |
| Tp_151754    |     | Tp_151754    |            | Kinesin-14   | 14A                                                             |
| Tp_152375    |     | Tp_152375    |            | Kinesin-14   | 14A                                                             |
| Tp_154168    |     | Tp_154168    |            | U/G          |                                                                 |
| Tp_155696    |     | Tp_155696    |            | Kinesin-4/10 |                                                                 |
| Tp_156428    |     | Tp_156428    |            | Kinesin-4/10 |                                                                 |
| Tp_159990    |     | Tp_159990    |            | Kinesin-7    |                                                                 |
| Tp_163717    |     | Tp_163717    |            | Kinesin-7    |                                                                 |
| Tp_170556    |     | Tp_170556    |            | Kinesin-7    |                                                                 |
| Tt_10348     |     | Tt_10348     |            | Kinesin-8    |                                                                 |
| Tt_11898     |     | Tt_11898     |            | Kinesin-14   | C-terminal motor kinesin-like protein [Tetrahymena thermophila] |
| Tt_12384     |     | Tt_12384     |            | Kinesin-14   |                                                                 |
| Tt_12566     |     | Tt_12566     |            | Kinesin-2    |                                                                 |
| Tt_12668     |     | Tt_12668     |            | Kinesin-1    |                                                                 |
| Tt_12786     |     | Tt_12786     |            | Kinesin-1    |                                                                 |
| Tt_12789     |     | Tt_12789     |            | Kinesin-1    |                                                                 |
| Tt_13014     |     | Tt_13014     |            | Kinesin-15   |                                                                 |
| Tt_13299     |     | Tt_13299     |            | U/G          |                                                                 |
| Tt_1384      |     | Tt_1384      |            | Kinesin-13   |                                                                 |
| Tt_14757     |     | Tt_14757     |            | U/G          |                                                                 |
| Tt_15631     |     | Tt_15631     |            | U/G          |                                                                 |
| Tt_15647     |     | Tt_15647     |            | U/G          |                                                                 |
| Tt_15731     |     | Tt_15731     |            | Kinesin-2    |                                                                 |
| Tt_15992     |     | Tt_15992     |            | U/G          |                                                                 |
| Tt_16107     |     | Tt_16107     |            | Kinesin-12   |                                                                 |
| Tt_16125     |     | Tt_16125     |            | Kinesin-14   |                                                                 |
| Tt_16205     |     | Tt_16205     |            | U/G          |                                                                 |
| Tt_16410     |     | Tt_16410     |            | Kinesin-2    | kinesin-II [Tetrahymena thermophila]                            |
| Tt_16897     |     | Tt_16897     |            | Kinesin-9    |                                                                 |
| Tt_17359     |     | Tt_17359     |            | Kinesin-12   |                                                                 |
| Tt_18479     |     | Tt_18479     |            | U/G          |                                                                 |
| Tt_18731     |     | Tt_18731     |            | Kinesin-4/10 | Kinesin-4                                                       |
| Tt_18818     |     | Tt_18818     |            | Kinesin-9    |                                                                 |
| Tt_18837     |     | Tt_18837     |            | Kinesin-1    |                                                                 |
| Tt_19345     |     | Tt_19345     |            | Kinesin-8    |                                                                 |



|          |          |            |                                                |
|----------|----------|------------|------------------------------------------------|
| Tt_19349 | Tt_19349 | Kinesin-15 |                                                |
| Tt_19386 | Tt_19386 | Kinesin-8  |                                                |
| Tt_19538 | Tt_19538 | Kinesin-3  |                                                |
| Tt_19778 | Tt_19778 | Kinesin-6  |                                                |
| Tt_20875 | Tt_20875 | Kinesin-16 |                                                |
| Tt_21073 | Tt_21073 | Kinesin-2  |                                                |
| Tt_21406 | Tt_21406 | Kinesin-9  |                                                |
| Tt_21531 | Tt_21531 | U/G        |                                                |
| Tt_22386 | Tt_22386 | Kinesin-8  |                                                |
| Tt_23055 | Tt_23055 | U/G        |                                                |
| Tt_24380 | Tt_24380 | Kinesin-16 |                                                |
| Tt_24831 | Tt_24831 | Kinesin-16 |                                                |
| Tt_25951 | Tt_25951 | Kinesin-15 |                                                |
| Tt_26242 | Tt_26242 | Kinesin-12 |                                                |
| Tt_26427 | Tt_26427 | Kinesin-13 |                                                |
| Tt_27157 | Tt_27157 | Kinesin-14 | 14A                                            |
| Tt_28029 | Tt_28029 | U/G        |                                                |
| Tt_28876 | Tt_28876 | U/G        |                                                |
| Tt_29398 | Tt_29398 | Kinesin-2  | kinesin-II homologue [Tetrahymena thermophila] |
| Tt_29858 | Tt_29858 | U/G        |                                                |
| Tt_29877 | Tt_29877 | Kinesin-8  |                                                |
| Tt_3803  | Tt_3803  | Kinesin-1  |                                                |
| Tt_4272  | Tt_4272  | Kinesin-8  |                                                |
| Tt_4311  | Tt_4311  | Kinesin-12 |                                                |
| Tt_4329  | Tt_4329  | Kinesin-8  |                                                |
| Tt_4843  | Tt_4843  | Kinesin-8  |                                                |
| Tt_5241  | Tt_5241  | Kinesin-1  |                                                |
| Tt_5616  | Tt_5616  | Kinesin-1  | kinesin-II homologue [Tetrahymena thermophila] |
| Tt_6254  | Tt_6254  | Kinesin-2  |                                                |
| Tt_6255  | Tt_6255  | U/G        |                                                |
| Tt_6651  | Tt_6651  | U/G        |                                                |
| Tt_7195  | Tt_7195  | Kinesin-12 |                                                |
| Tt_7346  | Tt_7346  | Kinesin-8  |                                                |
| Tt_7691  | Tt_7691  | Kinesin-8  |                                                |
| Tt_7929  | Tt_7929  | U/G        |                                                |
| Tt_8098  | Tt_8098  | Kinesin-9  |                                                |
| Tt_8544  | Tt_8544  | U/G        |                                                |
| Tt_8981  | Tt_8981  | Kinesin-14 | 14A                                            |
| Tt_8991  | Tt_8991  | Kinesin-15 |                                                |
| Tt_9175  | Tt_9175  | Kinesin-13 |                                                |
| Tt_9312  | Tt_9312  | Kinesin-15 |                                                |
| Tt_9449  | Tt_9449  | Kinesin-3  |                                                |
| Tt_9577  | Tt_9577  | Kinesin-1  |                                                |
| Tt_9757  | Tt_9757  | Kinesin-1  |                                                |
